# Supplementary material for: Extent of aging across education and income subgroups in Thailand: Application of a characteristic-based age approach
Source: PubMed Central journal article supplement (PMC7723296; doi:10.1371/journal.pone.0243081), 2020-12-08
Supplement: pone.0243081.s001.pdf [file pone.0243081.s001.pdf]

**S1 Table. Percentage distribution of older sample who did not participate in grip and walking speed tests by education, income and gender**

|                               | Grip test |       | Waking speed test |       |
|-------------------------------|-----------|-------|-------------------|-------|
|                               | Men       | Women | Men               | Women |
| Total unweighted cases        | 4,493     | 4,682 | 4,493             | 4,682 |
| % did not undertake the test  | 1.5       | 1.3   | 2.7               | 3.4   |
| Education                     |           |       |                   |       |
| No education                  | 13.7      | 19.5  | 8.4               | 23.8  |
| Less than primary education   | 8.9       | 15.0  | 9.4               | 6.9   |
| Primary education             | 56.8      | 62.1  | 67.8              | 61.9  |
| Secondary or higher education | 20.6      | 3.4   | 14.4              | 7.5   |
| Total                         | 100.0     | 100.0 | 100.0             | 100.0 |
| Income tercile                |           |       |                   |       |
| Low                           | 69.6      | 43.2  | 67.0              | 57.8  |
| Middle                        | 12.2      | 34.8  | 20.3              | 20.0  |
| High                          | 18.2      | 22.0  | 12.7              | 22.2  |
| Total                         | 100.0     | 100.0 | 100.0             | 100.0 |
