# Supplementary material for: Extent of aging across education and income subgroups in Thailand: Application of a characteristic-based age approach
Source: PubMed Central journal article supplement (PMC7723296; doi:10.1371/journal.pone.0243081), 2020-12-08
Supplement: pone.0243081.s002.pdf [file pone.0243081.s002.pdf]

**S2 Table. Alpha-age for men and women by education level, using imputed values for missing data**

| Age                          | Men               |             |                     | Women             |             |                     |
|------------------------------|-------------------|-------------|---------------------|-------------------|-------------|---------------------|
|                              | Less than primary | Primary     | Secondary or higher | Less than primary | Primary     | Secondary or higher |
| <b>Grip strength</b>         |                   |             |                     |                   |             |                     |
| 60                           | <b>63.4</b>       | <b>66.0</b> | <b>70.7</b>         | 58.9              | <b>62.9</b> | <b>63.4</b>         |
| 65                           | <b>68.1</b>       | <b>70.5</b> | <b>75.0</b>         | 64.0              | <b>67.6</b> | <b>68.2</b>         |
| 70                           | <b>72.9</b>       | <b>75.2</b> | <b>79.4</b>         | 69.1              | <b>72.5</b> | <b>73.0</b>         |
| 75                           | <b>77.7</b>       | <b>79.8</b> | <b>83.8</b>         | 74.2              | <b>77.3</b> | <b>77.8</b>         |
| 80                           | <b>82.6</b>       | <b>84.6</b> | <b>88.3</b>         | 79.2              | <b>82.2</b> | <b>82.6</b>         |
| 85                           | <b>87.4</b>       | <b>89.3</b> | <b>92.9</b>         | 84.3              | <b>87.0</b> | <b>87.5</b>         |
| <b>Walking speed</b>         |                   |             |                     |                   |             |                     |
| 60                           | <b>64.5</b>       | <b>66.4</b> | <b>73.5</b>         | <b>62.3</b>       | <b>61.9</b> | <b>69.7</b>         |
| 65                           | <b>69.1</b>       | <b>71.0</b> | <b>77.6</b>         | <b>67.1</b>       | <b>66.8</b> | <b>74.0</b>         |
| 70                           | <b>73.9</b>       | <b>75.6</b> | <b>81.8</b>         | <b>72.0</b>       | <b>71.7</b> | <b>78.5</b>         |
| 75                           | <b>78.6</b>       | <b>80.2</b> | <b>86.2</b>         | <b>76.9</b>       | <b>76.6</b> | <b>82.9</b>         |
| 80                           | <b>83.4</b>       | <b>84.9</b> | <b>90.5</b>         | <b>81.7</b>       | <b>81.5</b> | <b>87.5</b>         |
| 85                           | <b>88.2</b>       | <b>89.6</b> | <b>95.0</b>         | <b>86.6</b>       | <b>86.4</b> | <b>92.1</b>         |
| <b>Overall body strength</b> |                   |             |                     |                   |             |                     |
| 60                           | <b>63.4</b>       | <b>65.9</b> | <b>72.2</b>         | 60.6              | <b>62.3</b> | <b>67.6</b>         |
| 65                           | <b>68.2</b>       | <b>70.5</b> | <b>76.4</b>         | 65.5              | <b>67.1</b> | <b>72.1</b>         |
| 70                           | <b>72.9</b>       | <b>75.1</b> | <b>80.7</b>         | 70.5              | <b>72.0</b> | <b>76.6</b>         |
| 75                           | <b>77.7</b>       | <b>79.8</b> | <b>85.1</b>         | 75.5              | <b>76.9</b> | <b>81.2</b>         |
| 80                           | <b>82.6</b>       | <b>84.5</b> | <b>89.5</b>         | 80.4              | <b>81.7</b> | <b>85.9</b>         |
| 85                           | <b>87.4</b>       | <b>89.3</b> | <b>94.0</b>         | 85.4              | <b>86.6</b> | <b>90.5</b>         |

Note: Alpha-ages shown in bold face are statistically significant at p-value=0.10.
