# Supplementary material for: Extent of aging across education and income subgroups in Thailand: Application of a characteristic-based age approach
Source: PubMed Central journal article supplement (PMC7723296; doi:10.1371/journal.pone.0243081), 2020-12-08
Supplement: pone.0243081.s003.pdf [file pone.0243081.s003.pdf]

**S3 Table. Sex-specific alpha-age by income tercile, using imputed values for missing data**

| Age                          | Men    |             | Women  |             |
|------------------------------|--------|-------------|--------|-------------|
|                              | Middle | High        | Middle | High        |
| <b>Grip strength</b>         |        |             |        |             |
| 60                           | 62.0   | <b>65.6</b> | 59.4   | 59.0        |
| 65                           | 66.9   | <b>70.2</b> | 64.5   | 64.1        |
| 70                           | 71.7   | <b>74.8</b> | 69.5   | 69.1        |
| 75                           | 76.6   | <b>79.5</b> | 74.5   | 74.2        |
| 80                           | 81.5   | <b>84.3</b> | 79.6   | 79.2        |
| 85                           | 86.4   | <b>89.0</b> | 84.6   | 84.3        |
| <b>Walking speed</b>         |        |             |        |             |
| 60                           | 62.9   | <b>67.5</b> | 61.4   | <b>64.5</b> |
| 65                           | 67.6   | <b>72.0</b> | 66.3   | <b>69.2</b> |
| 70                           | 72.5   | <b>76.5</b> | 71.2   | <b>73.9</b> |
| 75                           | 77.3   | <b>81.1</b> | 76.1   | <b>78.6</b> |
| 80                           | 82.2   | <b>85.7</b> | 81.0   | <b>83.4</b> |
| 85                           | 87.0   | <b>90.4</b> | 86.0   | <b>88.2</b> |
| <b>Overall body strength</b> |        |             |        |             |
| 60                           | 62.2   | <b>66.5</b> | 60.4   | <b>62.2</b> |
| 65                           | 67.0   | <b>71.0</b> | 65.3   | <b>67.0</b> |
| 70                           | 71.9   | <b>75.6</b> | 70.3   | <b>71.9</b> |
| 75                           | 76.8   | <b>80.3</b> | 75.3   | <b>76.7</b> |
| 80                           | 81.7   | <b>85.0</b> | 80.3   | <b>81.6</b> |
| 85                           | 86.6   | <b>89.7</b> | 85.3   | <b>86.5</b> |

Note: Alpha-ages shown in bold face are statistically significant at p-value=0.10.
